# Supplementary material for: Impact and cost-effectiveness of potential interventions against infant respiratory syncytial virus (RSV) in 131 low-income and middle-income countries using a static cohort model
Source: HighWire-hosted journal article supplement (doi:10.1136/bmjopen-2020-046563), 2021-04-01
Supplement: bmjopen-2020-046563supp001_data_supplement.pdf [file bmjopen-2020-046563supp001_data_supplement.pdf]

**Appendix Table 1. Cost of intervention and incremental cost-effectiveness ratios by country group (2030–2039).**

| Country group by                       | Maternal vaccine         |                             |                       | Monoclonal antibody      |                             |                       |
|----------------------------------------|--------------------------|-----------------------------|-----------------------|--------------------------|-----------------------------|-----------------------|
|                                        | Health care cost averted | Cost of vaccination program | ICER per DALY averted | Health care cost averted | Cost of vaccination program | ICER per DALY averted |
| <b>Gavi status</b>                     |                          |                             |                       |                          |                             |                       |
| Gavi (N=73)                            | 397,985,940              | 3,065,106,927               | 1,073                 | 1,311,275,193            | 3,028,242,872               | 315                   |
| Non-Gavi (N=58)                        | 204,118,914              | 2,398,496,379               | 1,681                 | 663,227,127              | 2,355,785,836               | 577                   |
| <b>World Bank Country income group</b> |                          |                             |                       |                          |                             |                       |
| LIC (N=34)                             | 131,178,798              | 886,636,675                 | 949                   | 420,421,498              | 867,885,189                 | 257                   |
| LMIC (N=46)                            | 299,612,949              | 2,557,430,903               | 1,311                 | 995,875,548              | 2,522,516,388               | 428                   |
| UMIC (N=51)                            | 171,313,107              | 2,019,535,727               | 1,631                 | 558,205,274              | 1,993,627,132               | 551                   |
| <b>Geographic region</b>               |                          |                             |                       |                          |                             |                       |
| East Asia & Pacific (N=20)             | 124,384,911              | 1,411,293,535               | 1,411                 | 392,896,831              | 1,380,338,857               | 479                   |
| Europe & Central Asia (N=20)           | 32,220,016               | 301,556,780                 | 1,425                 | 109,878,013              | 295,554,675                 | 437                   |
| Latin America & Caribbean (N=23)       | 46,562,615               | 515,567,727                 | 1,507                 | 146,732,622              | 492,924,565                 | 507                   |
| Middle East & North Africa (N=13)      | 45,216,714               | 496,642,134                 | 1,566                 | 154,303,356              | 504,915,613                 | 532                   |
| South Asia (N=8)                       | 155,092,982              | 1,187,286,456               | 1,138                 | 558,355,660              | 1,236,166,379               | 342                   |
| Sub-Saharan Africa (N=47)              | 198,627,617              | 1,551,256,674               | 1,169                 | 612,335,839              | 1,474,128,619               | 359                   |
| <b>Total (N=131)</b>                   | <b>602,104,854</b>       | <b>5,463,603,306</b>        | <b>1,342</b>          | <b>1,974,502,320</b>     | <b>5,384,028,709</b>        | <b>431</b>            |

Abbreviations: DALY, disability-adjusted life year; ICER, incremental cost-effectiveness ratio; LIC, low-income country; LMIC, low- and middle-income country; UMIC, upper-middle-income country.

**Appendix Table 2. Incremental cost-effectiveness ratio per disability-adjusted life year (DALY) averted as a percentage of gross domestic product (GDP) per capita across various scenarios.**

| Scenarios                         | Maternal vaccine |                    |                     |         |         |                 | Monoclonal antibody |                    |                     |         |         |                 |      |
|-----------------------------------|------------------|--------------------|---------------------|---------|---------|-----------------|---------------------|--------------------|---------------------|---------|---------|-----------------|------|
|                                   | Baseline         | Baseline low price | Baseline high price | Minimum | Maximum | Adjunct         | Baseline            | Baseline low price | Baseline high price | Minimum | Maximum | Adjunct         |      |
| Efficacy (%)                      | Trial (40%–60%)  | Trial (40%–60%)    | Trial (40%–60%)     | 30      | 90      | Trial (25%–39%) | 60%–70%             | 60%–70%            | 60%–70%             | 30      | 90      | Trial (25%–39%) |      |
| Duration of Protection (months)   | 3                | 3                  | 3                   | 4       | 6       | 6               | 6                   | 6                  | 6                   | 4       | 6       | 6               |      |
| Intervention cost (Gavi/non-Gavi) | \$3/\$5          | \$1.5/\$2.5        | \$6/\$10            | \$3/\$5 | \$3/\$5 | \$3/\$5         | \$3/\$5             | \$1.5/\$2.5        | \$6/\$10            | \$3/\$5 | \$3/\$5 | \$3/\$5         |      |
| Afghanistan                       | 1                | 163%               | 82%                 | 325%    | 240%    | 16%             | 7%                  | 41%                | 5%                  | 113%    | 234%    | 15%             | 7%   |
| Albania                           |                  | 37%                | 21%                 | 69%     | 55%     | 6%              | 17%                 | 11%                | 4%                  | 26%     | 55%     | 6%              | 17%  |
| Algeria                           |                  | 43%                | 25%                 | 79%     | 64%     | 10%             | 35%                 | 15%                | 7%                  | 31%     | 63%     | 9%              | 35%  |
| Angola                            | 1                | 36%                | 23%                 | 63%     | 54%     | 7%              | 4%                  | 12%                | 6%                  | 24%     | 53%     | 7%              | 4%   |
| Armenia                           | 1                | 31%                | 20%                 | 55%     | 47%     | 6%              | 14%                 | 10%                | 5%                  | 21%     | 47%     | 6%              | 14%  |
| Azerbaijan                        | 1                | 30%                | 19%                 | 52%     | 44%     | 5%              | 2%                  | 9%                 | 4%                  | 19%     | 44%     | 5%              | 2%   |
| Bangladesh                        | 1                | 83%                | 52%                 | 145%    | 123%    | 15%             | 8%                  | 27%                | 13%                 | 55%     | 122%    | 15%             | 8%   |
| Belarus                           |                  | 32%                | 18%                 | 59%     | 46%     | 4%              | 105%                | 9%                 | 3%                  | 21%     | 46%     | 4%              | 104% |
| Belize                            |                  | 34%                | 20%                 | 63%     | 51%     | 7%              | 12%                 | 12%                | 5%                  | 25%     | 50%     | 7%              | 12%  |
| Benin                             | 1                | 122%               | 63%                 | 240%    | 181%    | 20%             | 11%                 | 37%                | 11%                 | 90%     | 177%    | 19%             | 11%  |
| Bhutan                            | 1                | 40%                | 25%                 | 70%     | 59%     | 7%              | 8%                  | 12%                | 6%                  | 26%     | 58%     | 7%              | 8%   |
| Bolivia                           | 1                | 36%                | 23%                 | 63%     | 54%     | 6%              | 7%                  | 11%                | 5%                  | 23%     | 53%     | 6%              | 7%   |
| Bosnia & Herzegovina              |                  | 33%                | 19%                 | 61%     | 48%     | 5%              | 156%                | 10%                | 3%                  | 23%     | 48%     | 5%              | 156% |
| Botswana                          |                  | 26%                | 15%                 | 47%     | 39%     | 7%              | 10%                 | 10%                | 5%                  | 19%     | 38%     | 7%              | 10%  |

|                    |   |      |      |      |      |     |     |     |     |      |      |     |     |
|--------------------|---|------|------|------|------|-----|-----|-----|-----|------|------|-----|-----|
| Brazil             |   | 19%  | 11%  | 35%  | 28%  | 4%  | 11% | 7%  | 3%  | 14%  | 28%  | 4%  | 11% |
| Bulgaria           |   | 22%  | 13%  | 40%  | 32%  | 4%  | 19% | 7%  | 3%  | 15%  | 32%  | 4%  | 18% |
| Burkina Faso       | 1 | 158% | 80%  | 315% | 233% | 17% | 10% | 43% | 7%  | 114% | 232% | 17% | 10% |
| Burundi            | 1 | 333% | 168% | 663% | 490% | 33% | 27% | 86% | 12% | 235% | 484% | 31% | 27% |
| Cambodia           | 1 | 90%  | 56%  | 157% | 133% | 14% | 7%  | 27% | 12% | 58%  | 132% | 14% | 7%  |
| Cameroon           | 1 | 93%  | 59%  | 162% | 139% | 19% | 11% | 31% | 16% | 61%  | 134% | 18% | 11% |
| Cape Verde         |   | 56%  | 33%  | 102% | 83%  | 13% | 25% | 20% | 9%  | 40%  | 81%  | 12% | 24% |
| C.A. Rep.          | 1 | 260% | 133% | 513% | 386% | 40% | 9%  | 76% | 20% | 188% | 373% | 37% | 9%  |
| Chad               | 1 | 148% | 76%  | 291% | 220% | 25% | 7%  | 44% | 13% | 107% | 211% | 22% | 7%  |
| China              |   | 21%  | 12%  | 38%  | 31%  | 5%  | 13% | 8%  | 4%  | 15%  | 31%  | 5%  | 13% |
| Colombia           |   | 28%  | 16%  | 51%  | 41%  | 6%  | 16% | 10% | 5%  | 21%  | 41%  | 6%  | 16% |
| Comoros            | 1 | 75%  | 38%  | 148% | 111% | 10% | 9%  | 20% | 4%  | 52%  | 105% | 9%  | 9%  |
| Congo              | 1 | 71%  | 45%  | 123% | 106% | 15% | 14% | 25% | 13% | 49%  | 106% | 15% | 14% |
| Costa Rica         |   | 14%  | 8%   | 26%  | 21%  | 3%  | 27% | 5%  | 2%  | 10%  | 21%  | 3%  | 27% |
| Cuba               | 1 | 13%  | 8%   | 23%  | 18%  | 0%  | 22% | 2%  | 0%  | 7%   | 19%  | 0%  | 22% |
| Côte d'Ivoire      | 1 | 86%  | 55%  | 150% | 128% | 16% | 7%  | 28% | 14% | 57%  | 126% | 16% | 7%  |
| N. Korea           | 1 |      |      |      |      |     |     |     |     |      |      |     |     |
| D. Rep. Congo      | 1 | 212% | 109% | 419% | 314% | 30% | 14% | 59% | 14% | 150% | 301% | 27% | 13% |
| Djibouti           | 1 | 61%  | 38%  | 108% | 90%  | 7%  | 11% | 16% | 5%  | 37%  | 88%  | 6%  | 11% |
| Dominican Republic |   | 25%  | 14%  | 45%  | 37%  | 5%  | 8%  | 9%  | 4%  | 18%  | 36%  | 5%  | 8%  |
| Ecuador            |   | 27%  | 16%  | 49%  | 40%  | 6%  | 10% | 10% | 5%  | 20%  | 40%  | 6%  | 10% |
| Egypt              |   | 50%  | 29%  | 92%  | 74%  | 11% | 8%  | 18% | 8%  | 37%  | 74%  | 11% | 8%  |
| El Salvador        |   | 44%  | 26%  | 81%  | 66%  | 9%  | 22% | 15% | 7%  | 32%  | 64%  | 9%  | 21% |
| Equatorial Guinea  |   | 20%  | 12%  | 37%  | 30%  | 5%  | 4%  | 7%  | 4%  | 15%  | 30%  | 5%  | 4%  |
| Eritrea            | 1 |      |      |      |      |     |     |     |     |      |      |     |     |
| Ethiopia           | 1 | 127% | 65%  | 251% | 188% | 18% | 15% | 37% | 9%  | 93%  | 185% | 17% | 15% |
| Fiji               |   | 34%  | 20%  | 63%  | 51%  | 8%  | 9%  | 12% | 6%  | 25%  | 50%  | 8%  | 9%  |
| Gabon              |   | 26%  | 15%  | 47%  | 38%  | 5%  | 5%  | 9%  | 4%  | 18%  | 37%  | 5%  | 5%  |
| Gambia             | 1 | 130% | 65%  | 260% | 191% | 10% | 19% | 32% | 3%  | 91%  | 190% | 10% | 18% |
| Georgia            | 1 | 30%  | 19%  | 53%  | 45%  | 5%  | 42% | 9%  | 4%  | 20%  | 44%  | 5%  | 41% |

|               |   |      |      |      |      |     |      |     |     |      |      |     |      |
|---------------|---|------|------|------|------|-----|------|-----|-----|------|------|-----|------|
| Ghana         | 1 | 63%  | 40%  | 110% | 94%  | 12% | 11%  | 21% | 10% | 42%  | 92%  | 12% | 11%  |
| Grenada       |   | 17%  | 10%  | 31%  | 25%  | 4%  | 8%   | 6%  | 3%  | 12%  | 25%  | 4%  | 8%   |
| Guatemala     |   | 40%  | 24%  | 74%  | 60%  | 9%  | 5%   | 15% | 7%  | 30%  | 60%  | 9%  | 5%   |
| Guinea        | 1 | 134% | 68%  | 265% | 199% | 20% | 8%   | 40% | 10% | 99%  | 197% | 19% | 8%   |
| Guinea-Bissau | 1 | 147% | 75%  | 291% | 218% | 21% | 20%  | 43% | 10% | 108% | 215% | 20% | 19%  |
| Guyana        | 1 | 25%  | 16%  | 44%  | 37%  | 3%  | 10%  | 7%  | 3%  | 15%  | 36%  | 3%  | 9%   |
| Haiti         | 1 | 123% | 62%  | 246% | 181% | 10% | 8%   | 28% | 1%  | 83%  | 174% | 8%  | 8%   |
| Honduras      | 1 | 47%  | 29%  | 82%  | 69%  | 7%  | 44%  | 14% | 6%  | 30%  | 68%  | 7%  | 43%  |
| India         | 1 | 65%  | 41%  | 114% | 96%  | 9%  | 6%   | 19% | 7%  | 41%  | 95%  | 8%  | 6%   |
| Indonesia     | 1 | 32%  | 20%  | 57%  | 48%  | 5%  | 8%   | 10% | 4%  | 21%  | 48%  | 5%  | 8%   |
| Iran          |   | 32%  | 19%  | 59%  | 47%  | 7%  | 29%  | 11% | 5%  | 23%  | 47%  | 7%  | 29%  |
| Iraq          |   | 38%  | 22%  | 70%  | 56%  | 8%  | 18%  | 13% | 6%  | 27%  | 55%  | 8%  | 18%  |
| Jamaica       |   | 34%  | 20%  | 63%  | 51%  | 7%  | 36%  | 12% | 5%  | 25%  | 50%  | 7%  | 35%  |
| Jordan        |   | 41%  | 24%  | 74%  | 60%  | 8%  | 20%  | 13% | 6%  | 29%  | 59%  | 8%  | 19%  |
| Kazakhstan    |   | 22%  | 13%  | 41%  | 32%  | 4%  | 10%  | 7%  | 2%  | 15%  | 32%  | 3%  | 10%  |
| Kenya         | 1 | 81%  | 51%  | 141% | 120% | 13% | 8%   | 25% | 11% | 52%  | 118% | 12% | 8%   |
| Kiribati      | 1 | 76%  | 48%  | 132% | 113% | 13% | 23%  | 24% | 12% | 50%  | 112% | 13% | 23%  |
| Kyrgyzstan    | 1 | 106% | 67%  | 184% | 157% | 20% | 34%  | 35% | 17% | 70%  | 156% | 20% | 33%  |
| Lao PDR       | 1 | 51%  | 32%  | 88%  | 76%  | 10% | 3%   | 16% | 8%  | 33%  | 73%  | 9%  | 2%   |
| Lebanon       |   | 19%  | 11%  | 34%  | 27%  | 4%  | 54%  | 6%  | 3%  | 13%  | 27%  | 4%  | 53%  |
| Lesotho       | 1 | 121% | 76%  | 211% | 179% | 19% | 10%  | 36% | 16% | 76%  | 173% | 18% | 10%  |
| Liberia       | 1 | 130% | 66%  | 258% | 192% | 15% | 17%  | 35% | 7%  | 93%  | 189% | 15% | 16%  |
| Libya         |   | 40%  | 24%  | 74%  | 60%  | 8%  | 109% | 14% | 6%  | 29%  | 59%  | 8%  | 108% |
| Madagascar    | 1 | 234% | 120% | 462% | 346% | 33% | 14%  | 66% | 16% | 167% | 335% | 30% | 14%  |
| Malawi        | 1 | 307% | 154% | 614% | 449% | 21% | 36%  | 70% | 1%  | 207% | 438% | 18% | 35%  |
| Malaysia      |   | 17%  | 10%  | 32%  | 26%  | 4%  | 27%  | 6%  | 3%  | 13%  | 26%  | 4%  | 27%  |
| Maldives      |   | 16%  | 9%   | 29%  | 23%  | 4%  | 52%  | 6%  | 3%  | 12%  | 23%  | 4%  | 52%  |
| Mali          | 1 | 125% | 65%  | 247% | 186% | 21% | 12%  | 39% | 11% | 93%  | 183% | 20% | 12%  |
| Mauritania    | 1 | 117% | 74%  | 203% | 174% | 24% | 15%  | 38% | 19% | 76%  | 167% | 22% | 15%  |
| Mauritius     |   | 17%  | 10%  | 31%  | 25%  | 4%  | 18%  | 6%  | 3%  | 13%  | 25%  | 4%  | 18%  |
| Mexico        |   | 20%  | 11%  | 36%  | 29%  | 4%  | 11%  | 7%  | 3%  | 14%  | 29%  | 4%  | 11%  |
| Micronesia    |   | 55%  | 32%  | 100% | 81%  | 13% | 23%  | 20% | 10% | 40%  | 81%  | 13% | 23%  |
| Mongolia      | 1 | 33%  | 21%  | 57%  | 48%  | 6%  | 4%   | 11% | 5%  | 21%  | 48%  | 6%  | 4%   |

|                       |   |      |      |      |      |     |      |     |     |      |      |     |      |
|-----------------------|---|------|------|------|------|-----|------|-----|-----|------|------|-----|------|
| Montenegro            |   | 23%  | 13%  | 42%  | 33%  | 3%  | 108% | 7%  | 2%  | 15%  | 33%  | 3%  | 108% |
| Morocco               |   | 58%  | 34%  | 106% | 85%  | 12% | 24%  | 20% | 9%  | 41%  | 84%  | 12% | 24%  |
| Mozambique            | 1 | 245% | 124% | 487% | 361% | 28% | 34%  | 67% | 12% | 177% | 360% | 27% | 34%  |
| Myanmar               | 1 | 98%  | 62%  | 169% | 144% | 18% | 9%   | 32% | 16% | 64%  | 144% | 18% | 9%   |
| Namibia               |   | 39%  | 23%  | 72%  | 58%  | 9%  | 7%   | 14% | 6%  | 29%  | 58%  | 9%  | 7%   |
| Nepal                 | 1 | 109% | 54%  | 221% | 160% | 3%  | 11%  | 23% | -2% | 73%  | 159% | 3%  | 11%  |
| Nicaragua             | 1 | 52%  | 33%  | 91%  | 77%  | 8%  | 15%  | 16% | 7%  | 33%  | 76%  | 8%  | 15%  |
| Niger                 | 1 | 266% | 135% | 529% | 392% | 29% | 20%  | 68% | 10% | 185% | 379% | 26% | 19%  |
| Nigeria               | 1 | 63%  | 40%  | 109% | 93%  | 14% | 3%   | 21% | 11% | 42%  | 91%  | 13% | 3%   |
| Pakistan              | 1 | 86%  | 54%  | 151% | 127% | 13% | 9%   | 24% | 10% | 52%  | 120% | 11% | 8%   |
| Papua New Guinea      | 1 | 51%  | 33%  | 89%  | 76%  | 10% | 8%   | 17% | 8%  | 34%  | 75%  | 10% | 8%   |
| Paraguay              |   | 31%  | 18%  | 57%  | 46%  | 6%  | 23%  | 10% | 5%  | 22%  | 45%  | 6%  | 23%  |
| Peru                  |   | 27%  | 16%  | 50%  | 40%  | 6%  | 9%   | 10% | 5%  | 20%  | 40%  | 6%  | 9%   |
| Philippines           |   | 58%  | 34%  | 106% | 85%  | 12% | 10%  | 20% | 9%  | 42%  | 85%  | 12% | 10%  |
| Republic of Moldova   | 1 | 58%  | 37%  | 102% | 86%  | 9%  | 12%  | 18% | 8%  | 38%  | 86%  | 9%  | 12%  |
| Romania               |   | 17%  | 10%  | 31%  | 25%  | 3%  | 7%   | 5%  | 2%  | 12%  | 25%  | 3%  | 7%   |
| Russian Federation    |   | 19%  | 11%  | 35%  | 28%  | 3%  | 25%  | 6%  | 2%  | 13%  | 28%  | 3%  | 25%  |
| Rwanda                | 1 | 127% | 65%  | 252% | 188% | 15% | 16%  | 34% | 6%  | 90%  | 183% | 14% | 15%  |
| Saint Lucia           |   | 18%  | 10%  | 33%  | 26%  | 4%  | 13%  | 6%  | 3%  | 13%  | 26%  | 4%  | 13%  |
| St. Vincent & Grenad. |   | 23%  | 14%  | 43%  | 35%  | 5%  | 11%  | 8%  | 4%  | 17%  | 35%  | 5%  | 11%  |
| Samoa                 |   | 45%  | 26%  | 81%  | 66%  | 11% | 26%  | 16% | 8%  | 33%  | 65%  | 11% | 26%  |
| S. Tome & Principe    | 1 | 68%  | 43%  | 118% | 100% | 11% | 13%  | 20% | 9%  | 43%  | 98%  | 10% | 13%  |
| Senegal               | 1 | 73%  | 37%  | 146% | 108% | 7%  | 10%  | 19% | 3%  | 52%  | 106% | 7%  | 10%  |
| Serbia                |   | 29%  | 17%  | 55%  | 43%  | 4%  | 114% | 8%  | 3%  | 20%  | 43%  | 4%  | 113% |
| Sierra Leone          | 1 | 194% | 97%  | 388% | 285% | 15% | 11%  | 47% | 3%  | 134% | 282% | 14% | 10%  |
| Solomon Islands       | 1 | 60%  | 38%  | 105% | 89%  | 11% | 15%  | 19% | 9%  | 38%  | 86%  | 10% | 15%  |
| Somalia               | 1 | 217% | 113% | 425% | 323% | 41% | 17%  | 69% | 23% | 161% | 310% | 38% | 16%  |

|                    |   |      |      |      |      |     |      |     |     |      |      |     |      |
|--------------------|---|------|------|------|------|-----|------|-----|-----|------|------|-----|------|
| South Africa       |   | 33%  | 19%  | 61%  | 49%  | 7%  | 8%   | 11% | 5%  | 24%  | 48%  | 7%  | 7%   |
| South Sudan        | 1 | 396% | 196% | 797% | 580% | 20% | 14%  | 85% | -4% | 264% | 564% | 17% | 14%  |
| Sri Lanka          | 1 | 30%  | 19%  | 52%  | 44%  | 6%  | 67%  | 10% | 5%  | 20%  | 44%  | 6%  | 66%  |
| State of Palestine |   | 59%  | 35%  | 108% | 89%  | 16% | 124% | 23% | 12% | 45%  | 88%  | 16% | 123% |
| Sudan              | 1 | 51%  | 32%  | 89%  | 75%  | 9%  | 9%   | 16% | 8%  | 33%  | 74%  | 9%  | 9%   |
| Suriname           |   | 30%  | 18%  | 55%  | 44%  | 7%  | 10%  | 11% | 5%  | 22%  | 44%  | 6%  | 10%  |
| Swaziland          |   | 64%  | 38%  | 117% | 95%  | 14% | 7%   | 23% | 11% | 47%  | 95%  | 14% | 7%   |
| Syria              |   |      |      |      |      |     |      |     |     |      |      |     |      |
| Macedonia          |   | 31%  | 18%  | 57%  | 45%  | 4%  | 45%  | 9%  | 3%  | 21%  | 45%  | 4%  | 44%  |
| Tajikistan         | 1 | 116% | 60%  | 230% | 172% | 16% | 7%   | 34% | 8%  | 85%  | 171% | 16% | 7%   |
| Thailand           |   | 28%  | 16%  | 51%  | 41%  | 6%  | 32%  | 10% | 5%  | 20%  | 41%  | 6%  | 32%  |
| Timor-Leste        | 1 | 60%  | 38%  | 104% | 89%  | 11% | 7%   | 19% | 9%  | 38%  | 86%  | 10% | 7%   |
| Togo               | 1 | 162% | 82%  | 321% | 239% | 19% | 22%  | 44% | 8%  | 115% | 234% | 18% | 21%  |
| Tonga              |   | 47%  | 28%  | 86%  | 70%  | 11% | 24%  | 17% | 8%  | 35%  | 69%  | 11% | 23%  |
| Tunisia            |   | 46%  | 27%  | 84%  | 68%  | 10% | 83%  | 16% | 8%  | 33%  | 67%  | 10% | 83%  |
| Turkey             |   | 15%  | 9%   | 27%  | 22%  | 3%  | 25%  | 5%  | 2%  | 11%  | 22%  | 3%  | 25%  |
| Turkmenistan       |   | 27%  | 16%  | 50%  | 40%  | 5%  | 4%   | 9%  | 4%  | 19%  | 40%  | 5%  | 4%   |
| Uganda             | 1 | 157% | 78%  | 315% | 230% | 9%  | 29%  | 35% | 0%  | 105% | 224% | 8%  | 29%  |
| Ukraine            | 1 | 52%  | 33%  | 90%  | 76%  | 8%  | 89%  | 16% | 7%  | 33%  | 76%  | 8%  | 89%  |
| Tanzania           | 1 | 103% | 52%  | 203% | 151% | 12% | 10%  | 27% | 5%  | 72%  | 146% | 11% | 10%  |
| Uzbekistan         | 1 | 56%  | 35%  | 97%  | 83%  | 10% | 5%   | 18% | 9%  | 37%  | 82%  | 10% | 5%   |
| Vanuatu            |   | 62%  | 37%  | 113% | 92%  | 15% | 10%  | 23% | 11% | 46%  | 91%  | 15% | 10%  |
| Venezuela          |   |      |      |      |      |     |      |     |     |      |      |     |      |
| Viet Nam           | 1 | 51%  | 32%  | 89%  | 75%  | 9%  | 21%  | 16% | 8%  | 34%  | 75%  | 9%  | 21%  |
| Yemen              | 1 | 69%  | 35%  | 137% | 102% | 10% | 13%  | 20% | 5%  | 50%  | 100% | 9%  | 13%  |
| Zambia             | 1 | 99%  | 62%  | 173% | 146% | 15% | 11%  | 29% | 13% | 62%  | 143% | 14% | 11%  |
| Zimbabwe           | 1 | 74%  | 37%  | 146% | 109% | 9%  | 5%   | 21% | 4%  | 54%  | 108% | 9%  | 5%   |

Note: Country by Gavi status (Gavi country = 1). Current GDP values were not available for 4 countries (Venezuela, Syria, Eretria, North Korea)

and were excluded from the analysis.

\*Negative cost-effectiveness ratio implies cost savings.

Cells in green indicate lower ICER to GDP ratio and cells in red indicate higher ICER to GDP ratio.
